# Supplementary material for: Morphology Effect of Bismuth Vanadate on Electrochemical Sensing for the Detection of Paracetamol
Source: MDPI journal article supplement (doi:10.3390/nano12071173), 2022-04-01
Supplement: s1 [file s1]

## Supporting Information

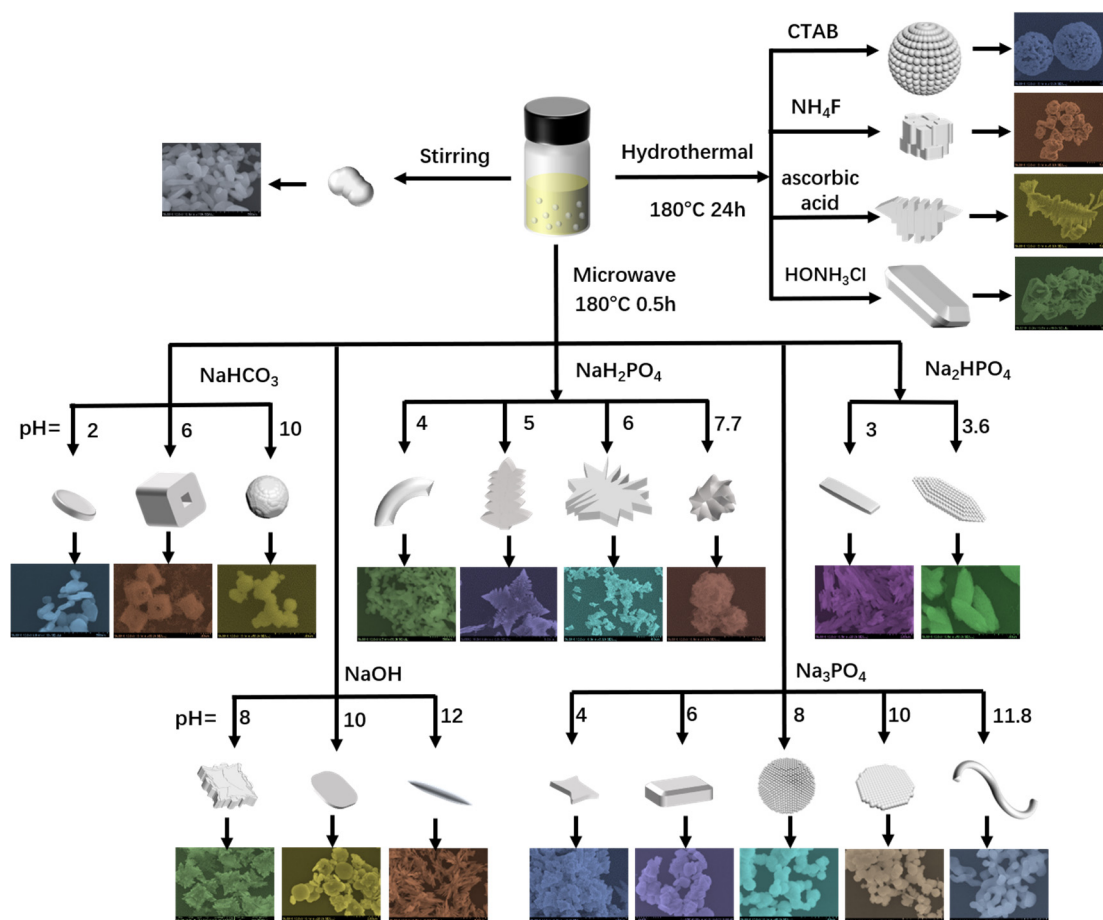

**Figure S1.** The synthesis produces of morphology-dependent  $\text{BiVO}_4$  by stirring, hydrothermal and micro wave methods.

The  $\text{BiVO}_4$  powders were synthesis by stirring, hydrothermal and micro wave methods, respectively. As a control sample, the nanoparticle  $\text{BiVO}_4$  was prepared by stirring 30 min with the mixture of  $\text{Bi}(\text{NO}_3)_3$  and  $\text{NH}_4\text{VO}_4$ . Beside, the hydrothermal approach also used as a reference experimental method. The hexadecyl trimethyl ammonium bromide (CTAB, Sigma-Aldrich,  $\geq 99\%$ ),  $\text{NH}_4\text{F}$  (Sigma-Aldrich,  $\geq 99.99\%$ ), L-ascorbic acid (TCI,  $>99.0\%$ ) and  $\text{HONH}_3\text{Cl}$  (Skychy Group, AR) were used as surfactant

to obtain the different morphology of  $\text{BiVO}_4$  (sphere, cube, irregular and cuboid shapes). As a short time and efficient preparation method, the microwave approach can shorten the preparation time effectively, from 24 hours to 30 minutes. The morphology of  $\text{BiVO}_4$  can be controlled with different additives, including  $\text{NaH}_2\text{PO}_4$ ,  $\text{Na}_2\text{HPO}_4$ ,  $\text{Na}_3\text{PO}_4$ ,  $\text{Na}_2\text{CO}_3$  and  $\text{NaOH}$ . The pH values of solution from 2 to 10 were further adjusted by adding  $\text{HCl}$  or  $\text{NaOH}$ . Due to the difference in ionization and hydrolysis of phosphate, carbonate and alkaline, the morphology of bismuth vanadate could form many different shapes, including nanosheet, tetrahedron, cuboid, sphere and irregular shapes.

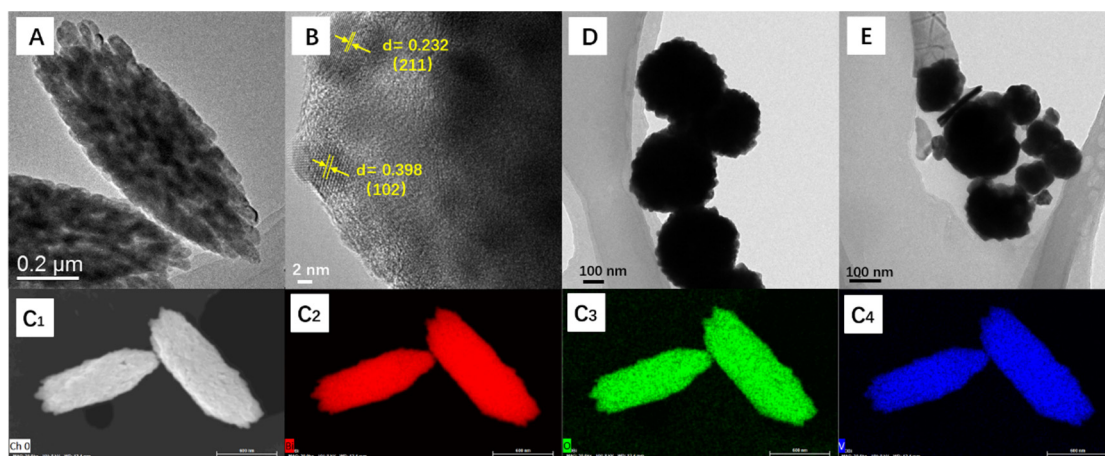

**Figure S2.** (A) TEM, (B) HRTEM and EDS mapping images of fusiform  $\text{BiVO}_4$ . TEM images of (D) flowered and (E) particle  $\text{BiVO}_4$ .

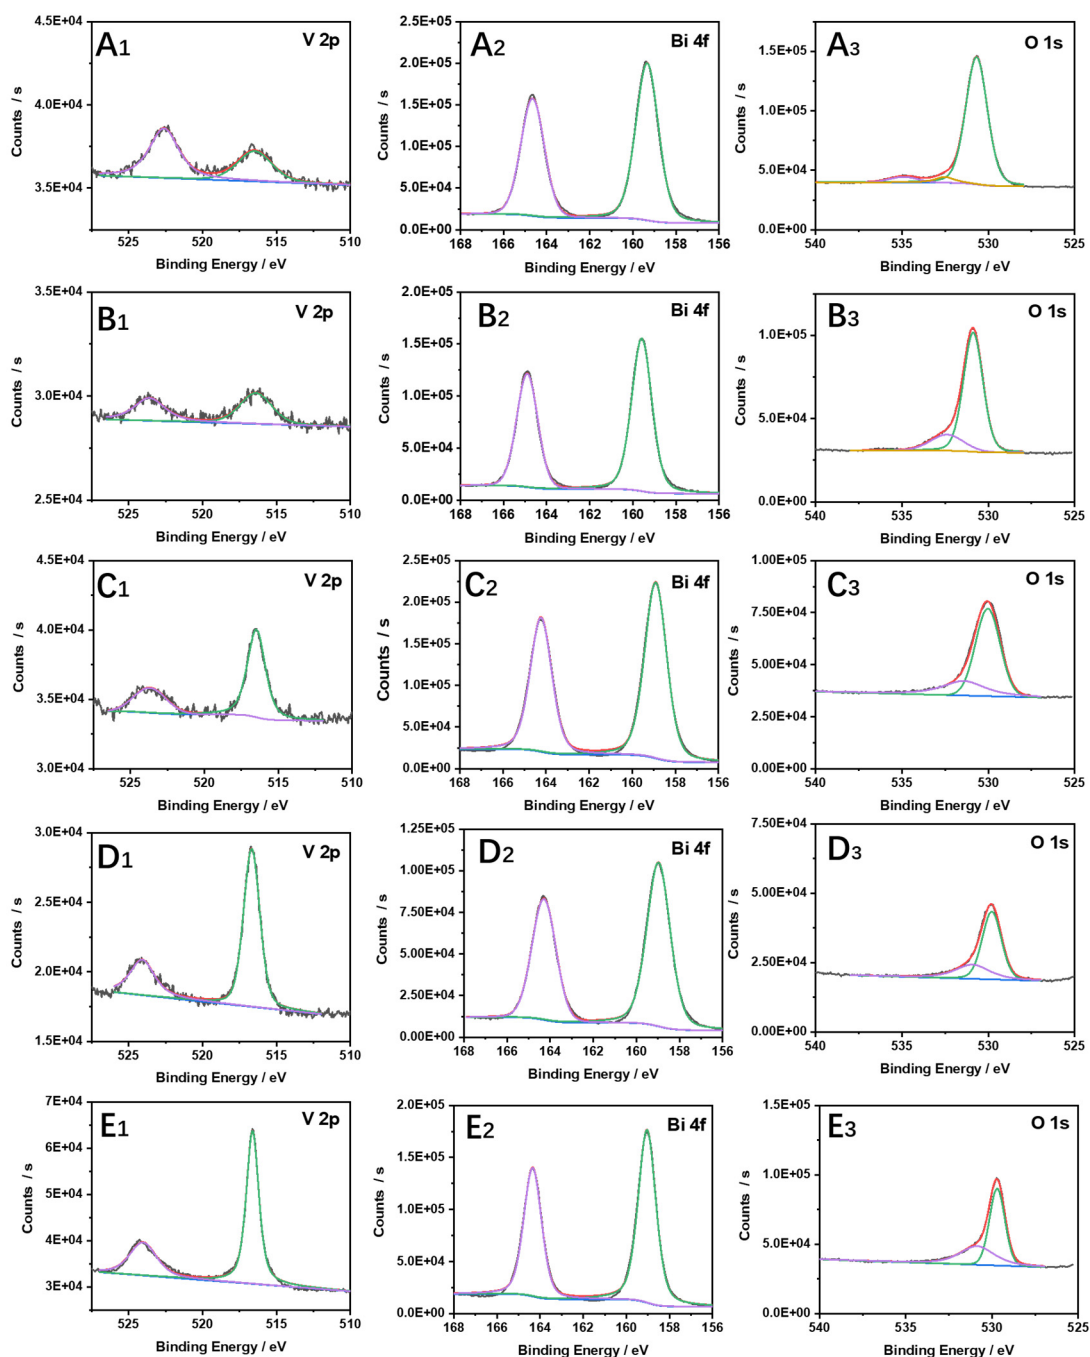

**Figure S3.** High-resolution XPS spectra of V 2p, Bi 4f and O 1s. (A) clavate (B) fusiform (C) flowered, (D) bulky and (E) particle  $\text{BiVO}_4$ .

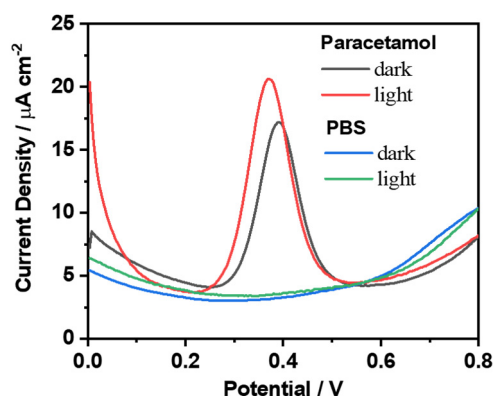

**Figure S4.** DPV curves of clavate  $\text{BiVO}_4$  in 0.01 M PBS with and without 100  $\mu\text{M}$  paracetamol. The DPV test was performance under dark condition (labeled as dark) and in illumination condition (labeled as light).

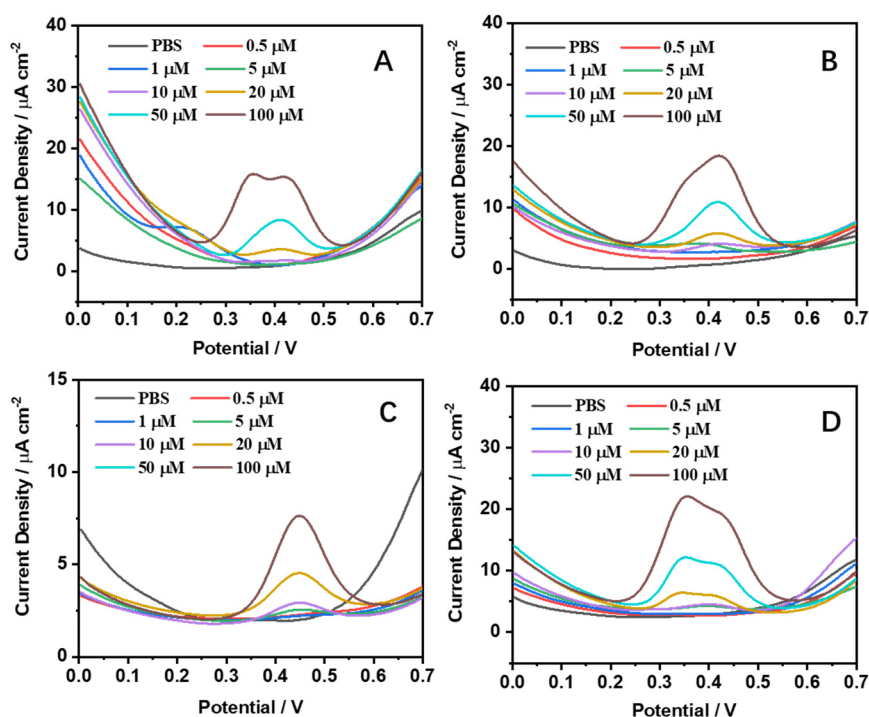

**Figure S5.** DPV curves at (A) fusiform (B) flowered, (C) bulky and (D) particle  $\text{BiVO}_4$  in 0.01 M PBS with 0-100  $\mu\text{M}$  paracetamol.

**Table S1.** Comparison between the present work and some reported sensors for paracetamol determination.

| Sensor                                        | Solution                  | Linear range                          | LOD          | Ref. |
|-----------------------------------------------|---------------------------|---------------------------------------|--------------|------|
| MWCNTs/GO                                     | 0.05 M PBS<br>(pH 7.0)    | 0.5-400 mM                            | 47 nM        | [1]  |
| Au NPs                                        | PBS (pH 7.4)              | 0.05-270 $\mu$ M                      | 14.6 nM      | [2]  |
| Au@graphene/<br>PEDOT                         | PBS<br>(pH 7.0)           | 0.15-5.88 mM                          | 41 nM        | [3]  |
| TiO <sub>2</sub> -graphene                    | 0.1 M PBS<br>0.2 (pH 7.0) | 1-100 $\mu$ M                         | 0.21 $\mu$ M | [4]  |
| Co/MWCNTs                                     | 0.1 M PBS                 | $5.2 \times 10^{-3}$ -0.45 $\mu$ M    | 1.0 nM       | [5]  |
| Pd/GO                                         | 0.1 M PBS<br>(pH 6.8)     | 0.005-0.5 $\mu$ M<br>0.5-80.0 $\mu$ M | 2.2 nM       | [6]  |
| PS-PNIPAm-<br>PS/MWCNTs-<br>COOH/N-<br>GQDs   | 0.1 M PBS<br>0.2 (pH 7.0) | 0.1-7.0 $\mu$ M<br>7.0-103.0 $\mu$ M  | 66 nM        | [7]  |
| Polymeric<br>micelle                          | PBS solution<br>(pH 7.0)  | $1 \times 10^{-3}$ - 4 m M            | 0.33 $\mu$ M | [8]  |
| g-C <sub>3</sub> N <sub>4</sub> /PANI/<br>CdO | 0.1 M PBS<br>(pH 7.4)     | 0.1-790 mM                            | 26 $\mu$ M   | [9]  |
| Au-Ag                                         | 0.2 M PBS<br>solution     | 0.01-0.1 mM                           | 2.6 $\mu$ M  | [10] |
| NiAl LED                                      | 0.1 M acetate<br>buffer   | 3-1500 $\mu$ M                        | 0.8 $\mu$ M  | [11] |
| CoFe <sub>2</sub> O <sub>4</sub>              | 0.1 M<br>phosphate        | 3-200 $\mu$ M                         | 250 nM       | [12] |

| buffer (pH 6.0)                    |                                       |                        |                    |           |
|------------------------------------|---------------------------------------|------------------------|--------------------|-----------|
| NiO NPs                            | BR buffer (pH 3.0)                    | 3.0-47.8 $\mu\text{M}$ | 0.12 $\mu\text{M}$ | [13]      |
| ZrO <sub>2</sub>                   | PBS (pH 7.4)                          | 10-60 $\mu\text{M}$    | 0.68 $\mu\text{M}$ | [14]      |
| Bi <sub>2</sub> O <sub>3</sub>     | 0.1 M KH <sub>2</sub> PO <sub>4</sub> | 0.5-1500 $\mu\text{M}$ | 0.2 $\mu\text{M}$  | [15]      |
| Fe <sub>2</sub> O <sub>3</sub> NPs | 0.1 M PBS (pH 7.0)                    | 2-170 $\mu\text{M}$    | 1.16 $\mu\text{M}$ | [16]      |
| Clavate-BiVO <sub>4</sub>          | 0.01 M PBS (pH 7.4)                   | 0.5-100 $\mu\text{M}$  | 0.2 $\mu\text{M}$  | This work |

LOD: limit of detection; PBS: phosphate buffer saline; BR buffer: Britton-Robison buffer; MWCNTs: multi-wall carbon nanotubes; GO: graphene oxide; PEDOT: Poly(3,4-ethylenedioxythiophene); PS-PNIPAm-PS: polymer poly(styrene-b-(N-isopropylacrylamide)-b-styrene); MWCNTs-COOH: carboxylated multi-walled carbon nanotubes; N-GQDs: amino-functionalized graphene quantum dots.

## References

1. X. Kang, J. Wang, H. Wu, J. Liu, I. A. Aksay, Y. Lin, A graphene-based electrochemical sensor for sensitive detection of paracetamol, *Talanta* 2010, 3, 754-759.
2. N. F. Atta, A. Galal, S. M. Azab, Electrochemical determination of paracetamol using gold nanoparticles-application in tablets and human fluids, *Int. J. Electrochem. Sci.* 2011, 6 5082-5096.
3. M. Li, W. Wang, Z. Chen, Z. Song, X. Luo, Electrochemical determination of paracetamol based on Au@graphene core-shell nanoparticles doped conducting polymer PEDOT nanocomposite, *Sens. Actuat. B-Chem.* 2018, 260, 778-785.
4. Y. Fan, J. Liu, H. Lu, Q. Zhang, Electrochemical behavior and voltammetric determination of paracetamol on Nafion/TiO<sub>2</sub>-

graphene modified glassy carbon electrode, *Colloid. Surface. B* 2011,85, 289-292.

5. A. Kutluay, M. Aslanoglu, An electrochemical sensor prepared by sonochemical one-pot synthesis of multi-walled carbon nanotube-supported cobalt nanoparticles for the simultaneous determination of paracetamol and dopamine, *Anal. Chim. Acta* 2014, 839, 59-66
6. J. Li, J. Liu, G. Tan, J. Jiang, S. Peng, M. Deng, D. Qian, Y. Feng, Y. Liu, High-sensitivity paracetamol sensor based on Pd/graphene oxide nanocomposite as an enhanced electrochemical sensing platform, *Biosens. Bioelectron.* 2014, 54, 468-475..
7. P. Zhao, M. Ni, C. Chen, Z. Zhou, X. Li, C. Li, Y. Xie, J. Fei, Stimuli-enabled switch-like paracetamol electrochemical sensor based on thermosensitive polymer and MWCNTs-GQDs composite nanomaterial, *Nanoscale* 2019, 11, 7394-7403.
8. J. Luo, C. Fan, X. Wang, R. Liu, X. Liu, A novel electrochemical sensor for paracetamol based on molecularly imprinted polymeric micelles, *Sensor. Actuat. B-Chem* 2013,188,909-916.
9. S. Bonyadi, K. Ghanbari, M. Ghiasi, All-electrochemical synthesis of a three-dimensional mesoporous polymeric g-C<sub>3</sub>N<sub>4</sub>/PANI/CdO nanocomposite and its application as a novel sensor for the simultaneous determination of epinephrine, paracetamol, mefenamic acid, and ciprofloxacin, *New J. Chem.* 2020, 44, 3412.
10. R. Wei, Biosynthesis of Au–Ag alloy nanoparticles for sensitive electrochemical determination of paracetamol, *Int. J. Electrochem. Sci.* 2017, 12, 9131-9140.

11. K. Asadpour-Zeynali, R. Amini, Nanostructured hexacyanoferrate intercalated Ni/Al layered double hydroxide modified electrode as a sensitive electrochemical sensor for paracetamol determination, *Electroanalysis* 2017, 29, 635-642.
12. Y. Kumar, P. Pramanik, D. K. Das, Electrochemical detection of paracetamol and dopamine molecules using nano-particles of cobalt ferrite and manganese ferrite modified with graphite, *Heliyon*, 2019, 5, e02031.
13. P. B. Deroco, F. C. Vicentini, O. Fatibello-Filho, An electrochemical sensor for the simultaneous determination of paracetamol and codeine using a glassy carbon Electrode modified with nickel oxide Nanoparticles and carbon black, *Electroanalysis* 2015, 27, 2214-2220.
14. S. B. Matt, S. Raghavendra, M. Shivanna, M. Siddlinganahalli, D. M. Siddalingappa, Electrochemical detection of paracetamol by voltammetry techniques using pure zirconium oxide nanoparticle based modified carbon paste electrode, *J. Inorg. Organomet. P.* 2020, doi.org/10.1007/s10904-020-01743-y.
15. M. Zidan, T. W. Tee, A. H. Abdullah, Z. Zainal, G. J. Kheng, Electrochemical oxidation of paracetamol mediated by nanoparticles bismuth oxide modified glassy carbon Electrode, *Int. J. Electrochem. Sci.* 2011, 6, 279-288.
16. M. M. Vinay, Y. A. Nayaka, Iron oxide ( $\text{Fe}_2\text{O}_3$ ) nanoparticles modified carbon paste electrode as an advanced material for electrochemical investigation of paracetamol and dopamine, *J. Sci-Adv. Mater. Dev.* 2019, 4, 442-450.
